# Supplementary material for: Endocrine Treatment-Related Symptoms and Patient Outcomes in Breast Cancer: A Meta-Analysis
Source: PubMed Central journal article supplement — J Breast Cancer. 2018 Mar 23;21(1):37–44. doi: 10.4048/jbc.2018.21.1.37 (PMC5880964; doi:10.4048/jbc.2018.21.1.37), 2018-03-23
Supplement: jbc-21-37-s001.pdf [file jbc-21-37-s001.pdf]

**Supplementary Table 1.** eMethods: search strategies for PubMed, Embase, Cochrane database

| Database | Key words                                                                                                                                                                                                                                                                                                                                                                                                                                                                                                                                                                                                                                                                                                                                                                                                                                                                                                                                                    |
|----------|--------------------------------------------------------------------------------------------------------------------------------------------------------------------------------------------------------------------------------------------------------------------------------------------------------------------------------------------------------------------------------------------------------------------------------------------------------------------------------------------------------------------------------------------------------------------------------------------------------------------------------------------------------------------------------------------------------------------------------------------------------------------------------------------------------------------------------------------------------------------------------------------------------------------------------------------------------------|
| PubMed   | <p>"Breast cancer"[All Fields] OR "breast neoplasms"[MeSH]</p> <p>"Estrogen Antagonists"[MeSH] OR "Selective Estrogen Receptor Modulators"[MeSH] OR "Estrogen Antagonist"[MeSH] OR "hormone therapy"[All Fields] OR "endocrine therapy"[All Fields] OR "Tamoxifen"[All Fields] OR "Nolvadex"[All Fields] OR "Raloxifene"[All Fileds] OR "Aromatase Inhibitors"[All Fields] OR "Letrozole"[All Fields] OR "Anastrozole"[All Fields] OR "Exemestane"[All Fields]</p> <p>"adverse effects"[All Fields] OR "adverse effects"[MeSH] OR "drug-related side effects and adverse reactions"[MeSH] OR "sideeffects"[All Fields] OR "endocrine therapy related symptoms"[All Fields] OR "hormone therapy related symptoms"[All Fields]</p> <p>"survival"[All Fields] OR "Disease-Free Survival"[MeSH] OR "Survival Analysis"[MeSH] OR "Survival Rate"[MeSH] OR "Disease-Free Survival"[All Fields] OR "Recurrence-Free Survival"[All Fields] OR "Recurrence"[MeSH]</p> |
| Cochrane | <p>Breast cancer</p> <p>Survival OR disease-free survival OR recurrence-free survival OR recurrence OR survival rate OR survival analysis</p> <p>Estrogen antagonists OR Selective estrogen receptor modulators OR estrogen antagonist OR hormone therapy OR endocrine therapy OR tamoxifen OR Nolvadex OR raloxifene OR aromatase inhibitors OR letrozole OR anastrozole OR exemestane</p> <p>Adverse effects OR drug-related side effects and adverse reactions OR side effects OR endocrine therapy related symptoms OR hormone therapy related symptoms</p>                                                                                                                                                                                                                                                                                                                                                                                              |
| Embase   | <p>Breast cancer OR breast neoplasm</p> <p>Estrogen antagonist OR selective estrogen receptor modulators OR tamoxifen OR Nolvadex OR raloxifene OR aromatase inhibitor OR anastrozole OR letrozole OR exemestane OR endocrine therapy OR hormone therapy</p> <p>Adverse effects OR side effects OR endocrine symptoms OR endocrine therapy related symptoms OR hormone therapy related symptoms</p> <p>Survival OR disease free survival OR recurrence OR recurrence free survival</p>                                                                                                                                                                                                                                                                                                                                                                                                                                                                       |
