# Supplementary material for: Endocrine Treatment-Related Symptoms and Patient Outcomes in Breast Cancer: A Meta-Analysis
Source: PubMed Central journal article supplement — J Breast Cancer. 2018 Mar 23;21(1):37–44. doi: 10.4048/jbc.2018.21.1.37 (PMC5880964; doi:10.4048/jbc.2018.21.1.37), 2018-03-23
Supplement: jbc-21-37-s002.pdf [file jbc-21-37-s002.pdf]

**Supplementary Table 2.** Additional characteristics of the included studies

| Study                                          | Design                                                                                       | Study period              | Study drug                                                                                                                            | Cancer stage | Definition of symptoms                                                                                                                                                                                                                                                                                                                                                                                          | Primary outcome          | Adjusting factors in multivariate analysis                                                                                                                                      |
|------------------------------------------------|----------------------------------------------------------------------------------------------|---------------------------|---------------------------------------------------------------------------------------------------------------------------------------|--------------|-----------------------------------------------------------------------------------------------------------------------------------------------------------------------------------------------------------------------------------------------------------------------------------------------------------------------------------------------------------------------------------------------------------------|--------------------------|---------------------------------------------------------------------------------------------------------------------------------------------------------------------------------|
| Mortimer et al. WHEL trial (2008) [5]          | Multisite randomized controlled trial of the effectiveness of a high-vegetable, low-fat diet | Mar 1995–Nov 2000         | Tamoxifen                                                                                                                             | I (T1c)–IIIA | Hot flashes, night sweats                                                                                                                                                                                                                                                                                                                                                                                       | Recurrence-free survival | Age<br>Time interval between diagnosis and study entry<br>Tumor hormone receptor status<br>Baseline dietary fiber intake<br>Tumor stage<br>Tumor grade                          |
| Cuzick et al. ATAC trial (2008) [11]           | Phase 3, international, double-blind randomized control study                                | Jul 1996–Mar 2000         | Anastrozole 1 mg daily for 5 yr vs. tamoxifen 20 mg daily for 5 yr                                                                    | I–III        | VM: hot flushes, night sweats, cold sweats<br>MSK: arthralgia, arthritis, arthrosis, joint disorder                                                                                                                                                                                                                                                                                                             | Recurrence-free survival | Age<br>Body mass index<br>Previous use of hormone replacement therapy<br>Nodal status<br>Tumor size<br>Tumor grade                                                              |
| Mieog et al. IES study (2012) [8]              | Phase 3, international, double-blind randomized control study                                | Feb 1998–Feb 2003         | After tamoxifen for 2–3 yr, continue tamoxifen 20 or 30 mg daily vs. switch to exemestane 25 mg daily for the rest of the 5-yr period | I–III        | Arthralgia, arthritis, back pain, bone pain, carpal tunnel decompression, carpal tunnel syndrome, joint stiffness, localized osteoarthritis, monoarthritis, musculoskeletal pain, myalgia, osteoarthritis, pain in foot, pain in limb, periartthritis, polyarthritits, polymyalgia, polymyalgia rheumatica, rheumatoid arthritis, spinal osteoarthritis, fibromyalgia, buttock pain, musculoskeletal chest pain | Disease-free survival    | Treatment<br>Geographical region<br>Nodal status<br>Previous chemotherapy<br>Hormone replacement therapy                                                                        |
| Fontein et al. TEAM trial (2013) [10]          | Phase 3, multinational, open-label randomized controlled study                               | Jan 16, 2001–Jan 31, 2006 | Exemestane 25 mg qd for 5 yr vs tamoxifen 20 mg qd for 2.5–3 yr, followed by exemestane 25 mg qd for 2.5–2 yr                         | I–III        | VM: subjective and transient sensation of heat - hot flashes, night sweats<br>MSK: arthralgia, arthritis, arthrosis, myalgia, bone pain<br>VV: vaginal dryness, itching, vaginal discharge, dyspareunia, endometrial and libido disorders                                                                                                                                                                       | Disease-free survival    | Age<br>Country<br>Grade<br>T stage<br>N stage<br>Most extensive surgery<br>Adjuvant radiotherapy<br>Adjuvant chemotherapy                                                       |
| Huober et al. BIG 1-98 trial (2014) [9]        | Phase 3, international, double-blind randomized control study                                | 1998–2000                 | Tamoxifen 20 mg daily vs. letrozole 2.5 mg daily for 5 yr (switch regimen was not included in this study)                             | I–III        | VM: hot flushes, night sweats, vaginal dryness<br>MSK: arthralgia, myalgia, carpal tunnel syndrome                                                                                                                                                                                                                                                                                                              | Disease-free survival    | Treatment<br>Age quartile<br>Body mass index quartile<br>Prior hormone replacement therapy use<br>Nodal status<br>Tumor grade<br>Tumor size<br>Cooperative clinical trial group |
| Stearns et al. NCIC CTG MA.27 trial (2015) [7] | Phase 3, multinational, open-label randomized controlled study                               | Jun 2003–Jul 2008         | Exemestane 25 mg daily vs. anastrozole 1 mg daily for 5 yr                                                                            | I–III        | VM: hot flushes, sweating<br>MSK: joint pain, muscle pain, bone pain, arthritis, diminished joint function, other musculoskeletal problems                                                                                                                                                                                                                                                                      | Recurrence-free survival | Celecoxib<br>Aspirin<br>Trastuzumab<br>Tumor size<br>Lymph node status<br>Prior chemotherapy                                                                                    |

VM=vasomotor symptoms; MSK=musculoskeletal symptoms; qd=every day; VV=vulvovaginal symptoms.
