# Supplementary material for: Endocrine Treatment-Related Symptoms and Patient Outcomes in Breast Cancer: A Meta-Analysis
Source: PubMed Central journal article supplement — J Breast Cancer. 2018 Mar 23;21(1):37–44. doi: 10.4048/jbc.2018.21.1.37 (PMC5880964; doi:10.4048/jbc.2018.21.1.37), 2018-03-23
Supplement: jbc-21-37-s003.pdf [file jbc-21-37-s003.pdf]

**Supplementary Table 3.** Risk of bias assessment done by RoBANS tool

| Study                                          | Selection of participants | Confounding variable               | Measurement of exposure              | Blinding of outcome assessments | Incomplete outcome data | Selective outcome reporting |
|------------------------------------------------|---------------------------|------------------------------------|--------------------------------------|---------------------------------|-------------------------|-----------------------------|
| Mortimer et al. WHEL trial (2008) [5]          | Low                       | Low                                | Low                                  | Low                             | Low                     | Low                         |
| Cuzick et al. ATAC trial (2008) [11]           | Low                       | Low                                | High (no specific symptom checklist) | Low                             | Low                     | Low                         |
| Mieog et al. IES study (2012) [8]              | Low                       | High (not adjusted for tumor size) | High (no specific symptom checklist) | Low                             | Low                     | Low                         |
| Fontein et al. TEAM trial (2013) [10]          | Low                       | Low                                | High (no specific symptom checklist) | Low                             | Low                     | Low                         |
| Huober et al. BIG 1-98 trial (2014) [9]        | Low                       | Low                                | High (no specific symptom checklist) | Low                             | Low                     | Low                         |
| Stearns et al. NCIC CTG MA.27 trial (2015) [7] | Low                       | Low                                | Low                                  | Low                             | Low                     | Low                         |

RoBANS=Risk of Bias Assessment tool for Nonrandomized Studies.
