# Supplementary material for: Endocrine Treatment-Related Symptoms and Patient Outcomes in Breast Cancer: A Meta-Analysis
Source: PubMed Central journal article supplement — J Breast Cancer. 2018 Mar 23;21(1):37–44. doi: 10.4048/jbc.2018.21.1.37 (PMC5880964; doi:10.4048/jbc.2018.21.1.37), 2018-03-23
Supplement: jbc-21-37-s005.pdf [file jbc-21-37-s005.pdf]

Endocrine Treatment-Related Symptoms and Patient Outcomes

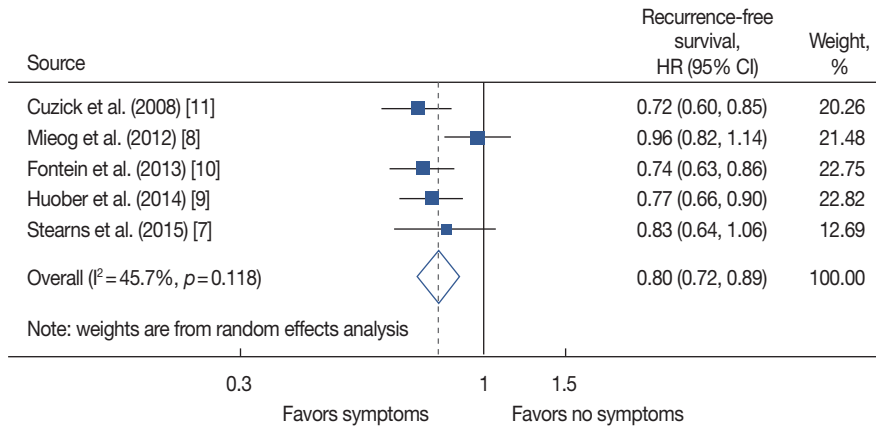

**Supplementary Figure 2.** Meta-analysis of endocrine treatment-related symptoms and recurrence-free survival in postmenopausal patients.
