# Supplementary figures and images for: Endocrine Treatment-Related Symptoms and Patient Outcomes in Breast Cancer: A Meta-Analysis
Source: PubMed Central journal article supplement — J Breast Cancer. 2018 Mar 23;21(1):37–44. doi: 10.4048/jbc.2018.21.1.37 (PMC5880964; doi:10.4048/jbc.2018.21.1.37), 2018-03-23

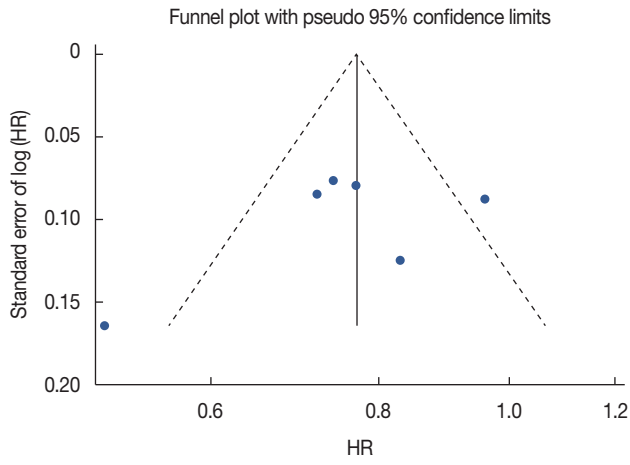

**Supplementary Figure 1.** Funnel plot of included studies.  
HR = hazard ratio.

Supplement: jbc-21-37-s004.pdf [file jbc-21-37-s004.pdf]
